# Supplementary material for: FTIR spectroscopy reveals lipid droplets in drug resistant laryngeal carcinoma cells through detection of increased ester vibrational bands intensity
Source: Royal Society of Chemistry journal article supplement (doi:10.1039/c4an00412d), 2014-01-01
Supplement: c4an00412d1.pdf [file c4an00412d1.pdf]

### Supplementary Information

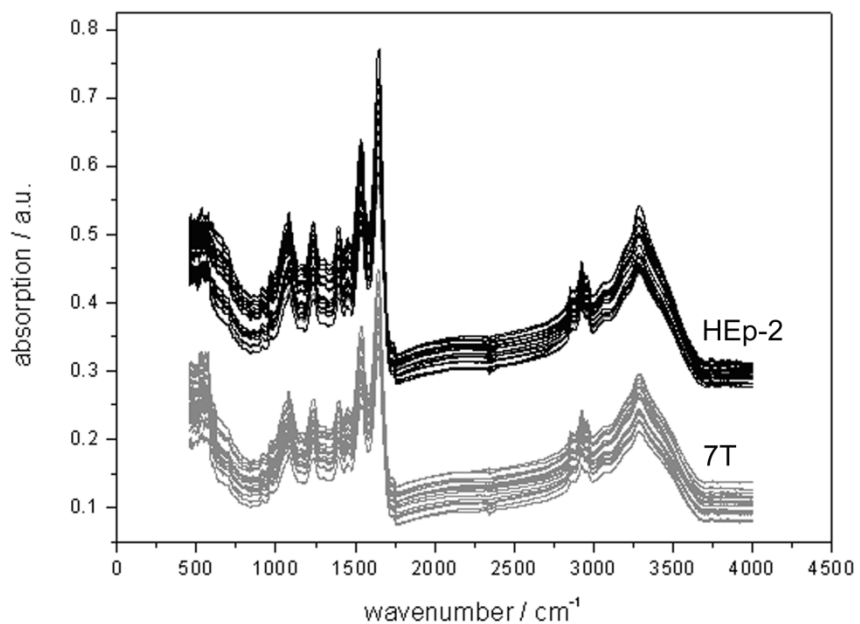

**Fig. S1.** ATR-FTIR rough spectra of parental HEp-2 and resistant 7T cells. 20 recorded spectra of each cell line are displayed with successive slight shifts to the top for better readability. The details about FTIR-ATR measurements are given in Materials and methods section.

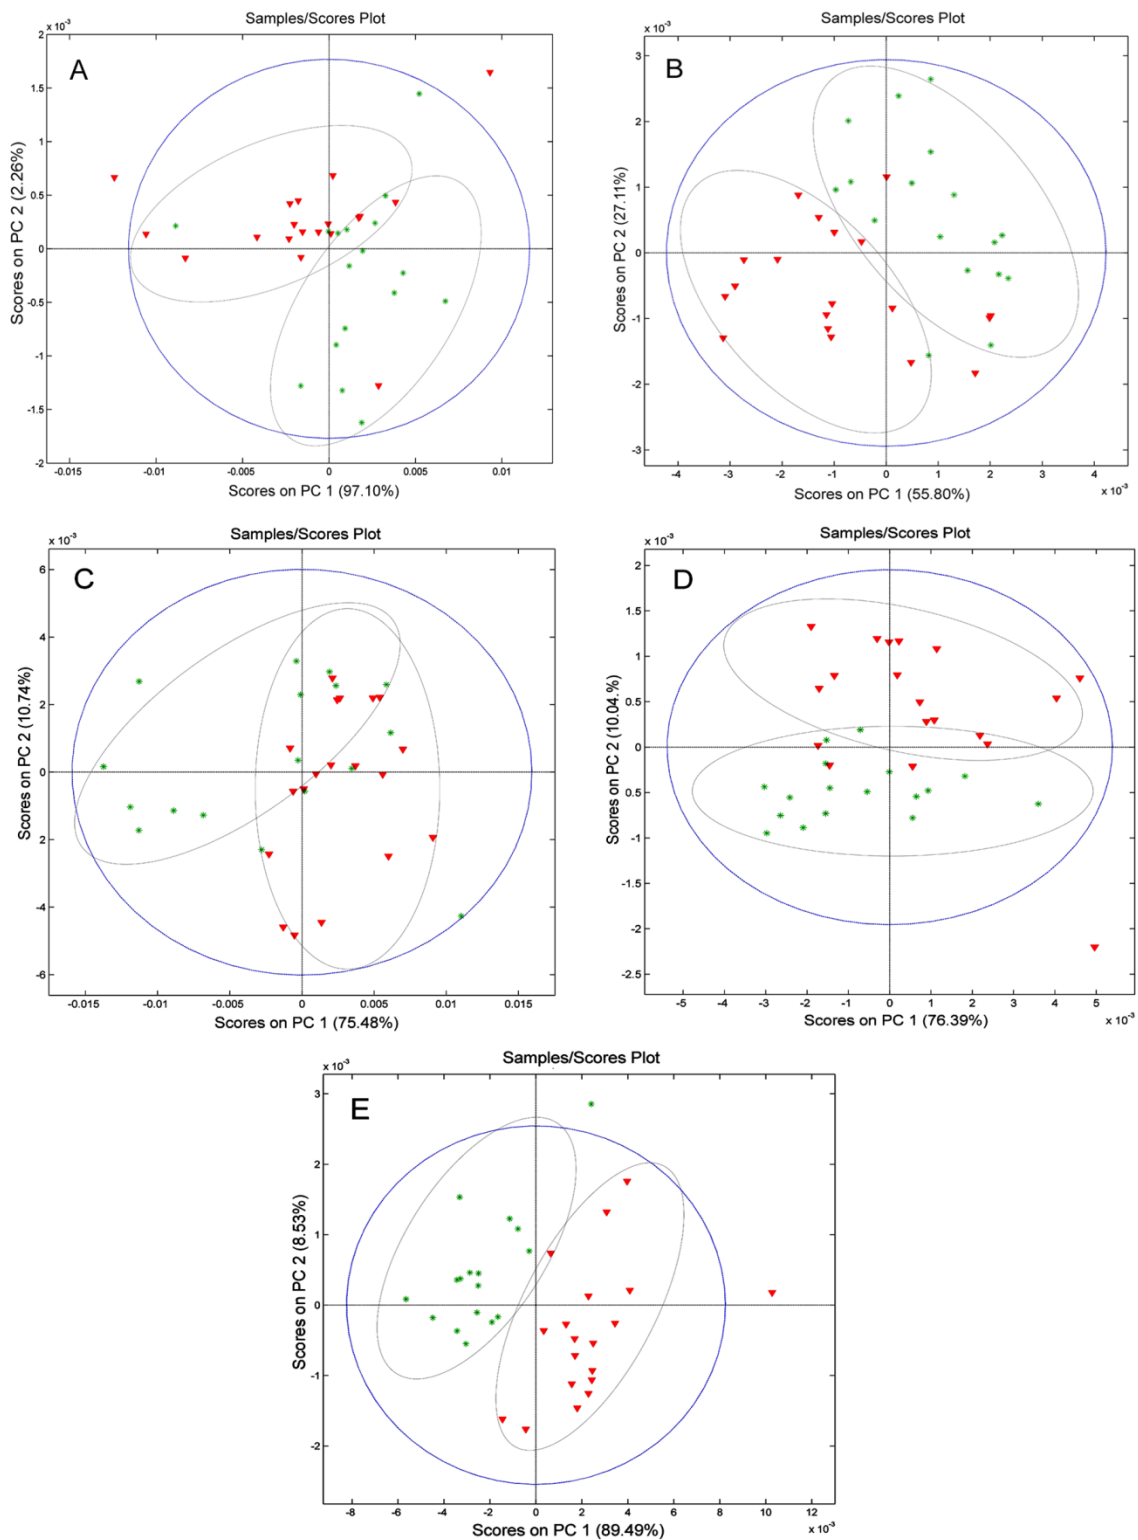

**Fig. S2.** PCA analysis of HEP-2 (green dots) and 7T (red triangles) FTIR spectra at (A) 2921  $\text{cm}^{-1}$ , (B) 1735  $\text{cm}^{-1}$ , (C) 1530  $\text{cm}^{-1}$ , (D) 1400-1340  $\text{cm}^{-1}$ , (E) 1170-1130  $\text{cm}^{-1}$ . Ellipses depicted in the figure define confidence limits, within which 95% of the data is allocated.
